# Supplementary material for: De Novo Transcriptome Analysis by PacBio SMRT-Seq and Illumina RNA-Seq Provides New Insights into Polyphenol Biosynthesis in Chinese Olive Fruit
Source: MDPI journal article supplement (doi:10.3390/horticulturae10030293), 2024-03-19
Supplement: s1 [file s1]

## Supplementary Tables

**Supplementary Table S1 Primer sequences for RT-qPCR**

| Gene ID        | Sense primer sequence (5'-3') | Anti-sense primer sequence (5'-3') |
|----------------|-------------------------------|------------------------------------|
| Isoform0032817 | TTGTCACCTTCACCACTCC           | CCTCATCCCAACCATCTTC                |
| Isoform0014291 | GAGCCATCCATCAACAGG            | TTCACATACGATACTCCCCAT              |
| Isoform0032534 | AGACAAGAACGCCAACACA           | TTGAAATCTCAGCAACCGA                |
| Isoform0019056 | TTATGCCTCTGCCGATGAT           | CCTGTGTTGGTGTTCCTGTCT              |
| Isoform0030613 | TTCGGAGTGAGAGTGGTTG           | ACAGCATCATCGGCAGAG                 |
| Isoform0022813 | TTCGTCAAGACAAGAACACC          | TGAAATCTCAGCAACCGTAT               |
| Isoform0016654 | TGTTTCGCTCTTCGCTATTT          | GACAACACTGGCAAACCTG                |
| Isoform0023526 | CAAGTTCGCTCTTCGCTAT           | CAACACTGGCAAACCTGG                 |
| Isoform0023929 | TGTTTCGCTCTTCGCTATTT          | GACAACACTGGCAAACCTG                |
| <i>ACT7</i>    | AACCCCAAGGCTAACAGG            | TGGCATACAGAGACAGGACA               |

**Supplementary Table S2 Information of raw reads in *C. album* from SMRT data**

|                 |             |
|-----------------|-------------|
| total base(bp)  | 20302433620 |
| subreads number | 9196552     |
| average length  | 2207        |
| N50             | 2897        |

**Supplementary Table S3 Categorize information of transcripts in *C. album* from SMRT data**

| Classify                   | Numbers |
|----------------------------|---------|
| Number of consensus reads  | 433875  |
| Number of five prime reads | 411428  |

|                                           |            |
|-------------------------------------------|------------|
| Number of three prime reads               | 409230     |
| Number of poly-A reads                    | 400999     |
| Number of filtered short reads            | 246        |
| Number of non-full-length reads           | 53494      |
| Number of full-length reads               | 380135     |
| Number of full-length non-chimeric reads  | 378289     |
| Number of full-length non-chimeric bases  | 1010171676 |
| Mean full-length non-chimeric read length | 2670       |

**Supplementary Table S4 Function annotation of isoforms in *C. album* from SMRT data**

| Database                       | Numbers | Percent (%) |
|--------------------------------|---------|-------------|
| Total Isoform                  | 135439  | 100.00      |
| Nr                             | 131160  | 96.84       |
| Swissport                      | 111664  | 82.45       |
| KOG                            | 95019   | 70.16       |
| GO                             | 70942   | 52.38       |
| KEGG                           | 59342   | 43.81       |
| annotation gene                | 131258  | 96.91       |
| without annotation gene number | 4181    | 3.09        |

**Supplementary Table S5 Statistics of data filtering from RNA-Seq data**

| Sample      | Before Filter |                           |            |            | After Filter    |                          |            |            | Reads<br>Len | GC(%) | adapter(%) | low<br>quality(%) |
|-------------|---------------|---------------------------|------------|------------|-----------------|--------------------------|------------|------------|--------------|-------|------------|-------------------|
|             | Reads<br>Num  | Before Filter<br>Data(bp) | Q20(%)     | Q30(%)     | Reads<br>Num(%) | After Filter<br>Data(bp) | Q20(%)     | Q30(%)     |              |       |            |                   |
| DAF2<br>0-1 | 41190<br>164  | 6178524600                | 6056456449 | 5820060086 | 41136360        | 6152183942               | 6035088663 | 5801095798 | 150          | 44.6  | 13552      | 79752             |
|             |               |                           | (98.02%)   | (94.2%)    | (99.87%)        |                          | (98.1%)    | (94.29%)   |              | 3     | (0.03%)    | (0.1%)            |
| DAF2<br>0-2 | 47608<br>214  | 7141232100                | 7006211531 | 6732569904 | 47558602        | 7109529827               | 6979731262 | 6708829769 | 150          | 44.7  | 12754      | 73012             |
|             |               |                           | (98.11%)   | (94.28%)   | (99.9%)         |                          | (98.17%)   | (94.36%)   |              | 2     | (0.03%)    | (0.08%)           |
| DAF2<br>0-3 | 42035<br>418  | 6305312700                | 6165398974 | 5904081022 | 41972498        | 6276363895               | 6142076738 | 5883489599 | 150          | 44.4  | 16386      | 92276             |
|             |               |                           | (97.78%)   | (93.64%)   | (99.85%)        |                          | (97.86%)   | (93.74%)   |              | 2     | (0.04%)    | (0.11%)           |
| DAF4<br>0-1 | 38087<br>886  | 5713182900                | 5590009924 | 5357500221 | 38031584        | 5685757635               | 5568062300 | 5338149321 | 150          | 44.5  | 13130      | 85584             |
|             |               |                           | (97.84%)   | (93.77%)   | (99.85%)        |                          | (97.93%)   | (93.89%)   |              | 3     | (0.03%)    | (0.11%)           |
| DAF4<br>0-2 | 36259<br>860  | 5438979000                | 5321379843 | 5099687454 | 36204780        | 5411632526               | 5299491105 | 5080403949 | 150          | 44.5  | 12898      | 83700             |
|             |               |                           | (97.84%)   | (93.76%)   | (99.85%)        |                          | (97.93%)   | (93.88%)   |              | 4     | (0.04%)    | (0.12%)           |
| DAF4<br>0-3 | 47704<br>276  | 7155641400                | 7001495622 | 6709453893 | 47636404        | 7120689394               | 6973190491 | 6684388091 | 150          | 44.4  | 16204      | 102404            |
|             |               |                           | (97.85%)   | (93.76%)   | (99.86%)        |                          | (97.93%)   | (93.87%)   |              | 3     | (0.03%)    | (0.11%)           |

|       |       |            |            |            |           |            |            |            |     |      |         |         |
|-------|-------|------------|------------|------------|-----------|------------|------------|------------|-----|------|---------|---------|
| DAF7  | 44821 | 6723175200 | 6581504297 | 6309973771 | 44758266  | 6679993070 | 6545258130 | 6277457787 | 150 | 44.5 | 14632   | 95704   |
| 0-1   | 168   |            | (97.89%)   | (93.85%)   | (99.86%)  |            | (97.98%)   | (93.97%)   |     | 3    | (0.03%) | (0.11%) |
| DAF7  | 44268 | 6640224300 | 6512456312 | 6261073942 | 44214850  | 6607327855 | 6485340692 | 6236844811 | 150 | 44.6 | 11228   | 83344   |
| 0-2   | 162   |            | (98.08%)   | (94.29%)   | (99.88%)  |            | (98.15%)   | (94.39%)   |     | 2    | (0.03%) | (0.09%) |
| DAF7  | 48120 | 7218143100 | 7058216271 | 6748544516 | 48062684  | 7184081669 | 7030267347 | 6723743733 | 150 | 44.6 | 14044   | 87780   |
| 0-3   | 954   |            | (97.78%)   | (93.49%)   | (99.88%)  |            | (97.86%)   | (93.59%)   |     | 6    | (0.03%) | (0.09%) |
| DAF1  | 49247 | 7387190700 | 7251250470 | 6975102525 | 49191836  | 7357479776 | 7226688119 | 6953091971 | 150 | 44.7 | 10800   | 89896   |
| 10-1  | 938   |            | (98.16%)   | (94.42%)   | (99.89%)  |            | (98.22%)   | (94.5%)    |     |      | (0.02%) | (0.09%) |
| DAF1  | 46554 | 6983138100 | 6826902751 | 6532669763 | 46490692  | 6951637966 | 6801162969 | 6509802010 | 150 | 44.7 | 12864   | 100556  |
| 10-2  | 254   |            | (97.76%)   | (93.55%)   | (99.86%)  |            | (97.84%)   | (93.64%)   |     |      | (0.03%) | (0.11%) |
| DAF1  | 37513 | 5627088300 | 5499579544 | 5258646219 | 37465892  | 5600357827 | 5477434930 | 5238865646 | 150 | 44.8 | 9468    | 76380   |
| 10-3  | 922   |            | (97.73%)   | (93.45%)   | (99.87%)  |            | (97.81%)   | (93.55%)   |     |      | (0.03%) | (0.1%)  |
| Total | 52341 | 7851183240 |            |            | 522724448 | 7813703538 |            |            |     |      |         | 1050388 |
|       | 2216  | 0          |            |            |           | 2          |            |            |     |      |         |         |

**Supplementary Table S6 Results of clean reads mapped to the *C. album* full-length transcripts**

| Sample   | All Reads Num | Unmapped Reads | Unique Mapped Reads | Multiple Mapped Reads | Mapping Ratio (%) |
|----------|---------------|----------------|---------------------|-----------------------|-------------------|
| DAF20-1  | 41135964      | 2338563        | 3152748             | 35644653              | 94.32             |
| DAF20-2  | 47558052      | 2604354        | 3519318             | 41434380              | 94.52             |
| DAF20-3  | 41972212      | 2478539        | 3200107             | 36293566              | 94.09             |
| DAF40-1  | 38030952      | 2071373        | 2775892             | 33183687              | 94.55             |
| DAF40-2  | 36204382      | 1958453        | 2638971             | 31606958              | 94.59             |
| DAF40-3  | 47635946      | 2640426        | 3481202             | 41514318              | 94.46             |
| DAF70-1  | 44757910      | 3143112        | 3295979             | 38318819              | 92.98             |
| DAF70-2  | 44214324      | 2201403        | 3173152             | 38839769              | 95.02             |
| DAF70-3  | 48062288      | 2300809        | 3419593             | 42341886              | 95.21             |
| DAF110-1 | 49191184      | 2280946        | 3421627             | 43488611              | 95.36             |
| DAF110-2 | 46490286      | 2136570        | 3178577             | 41175139              | 95.4              |
| DAF110-3 | 37465484      | 1703588        | 2566175             | 33195721              | 95.45             |

**Supplementary Table S7 The number of genes expressed in each sample in *C. album* from RNA-Seq data**

| Sample              | Genes Num | Ratio  |
|---------------------|-----------|--------|
| All Reference Genes | 135439    |        |
| All Samples Genes   | 113803    | 84.03% |
| DAF20-1             | 90717     | 66.98% |
| DAF20-2             | 91630     | 67.65% |
| DAF20-3             | 91455     | 67.52% |
| DAF40-1             | 91243     | 67.37% |
| DAF40-2             | 90959     | 67.16% |
| DAF40-3             | 92817     | 68.53% |

|          |       |        |
|----------|-------|--------|
| DAF70-1  | 92049 | 67.96% |
| DAF70-2  | 91964 | 67.90% |
| DAF70-3  | 92079 | 67.99% |
| DAF110-1 | 90909 | 67.12% |
| DAF110-2 | 90421 | 66.76% |
| DAF110-3 | 88481 | 65.33% |

---
